# Supplementary material
Source: publisher figshare collection journal article supplement (https://tandf.figshare.com/ndownloader/files/12467897)
Supplement: Supplementary file 1 [file 12467897]

Supplementary table 1. The composition of experimental diets

| **Ingredient (g/ kg)** | **Normal chow diet** | **High cholesterol diet** |
| --- | --- | --- |
| Casein | 195.0 | 195.0 |
| DL-Methionine | 3.0 | 3.0 |
| Sucrose | 325.46 | 325.46 |
| Corn Starch | 310.0 | 150.0 |
| Anhydrous Milkfat | 50.0 | 210.0 |
| Cholesterol | - | 12.5 |
| Cholic Acid | - | 5.0 |
| Cellulose | 50.0 | 50.0 |
| Mineral Mix | 35.0 | 35.0 |
| Calcium Carbonate | 4.0 | 4.0 |
| Vitamin Mix | 10.0 | 10.0 |
| Ethoxyquin (antioxidant) | 0.04 | 0.04 |
| Total (g) | 1,000 | 1,000 |
| Kcal 100 g-1 | 444 | 450 |
| Kcal g-1 | 4.44 | 4.5 |
